# Supplementary material
Source: HighWire-hosted journal article supplement (https://pn.bmj.com/content/23/4/327)
Supplement: inline-supplementary-material-9 [file inline-supplementary-material-9.pdf]

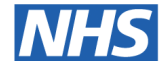

University College London Hospitals

NHS Foundation Trust

## First line immunosuppression in neuromuscular disease:

Initiation checklist

Patient details:

Diagnosis:

Definite  Probable  Possible

Evidence-based therapy: Y  N

Patient information booklet provided: Y  N

Informed consent Y  N

- Discussed alternatives Y  N
- Drug-specific risks discussed Y  N

General risk assessment:

- Baseline bloods  Y  N 
  - Normal Y  N
- TB: low risk  High risk/ treatment required
- Flu/ pneumococcal vaccinations: Y  N
- Baseline
  - Lung disease: Y  N
  - Liver disease Y  N
  - Renal impairment Y  N
- HIV, HBV, HVC checked Y  N
- Cardiovascular risk: Y  N 
  - Primary prevention Y  N
- PJP prophylaxis required Y  N
- Bone protection required Y  N 
  - FRAX Y  N
  - Vit D/ Calcium screen Y  N
- Pregnant Y  N 
  - Contraception advice Y  N

Drug specific monitoring

- As per guideline Y  N 
  - Normal Y  N

Outcome measures and baseline measurements:

|    | Date: |
|----|-------|
| 1. |       |
| 2. |       |
| 3. |       |
| 4. |       |
